# Supplementary material
Source: ML conference proceedings conference paper supplement (https://openreview.net/forum?id=bXhz5c12Ee)
Supplement: supplementary_material [file attachment]

# Training-Free Feature Reconstruction with Sparse Optimization for Vision-Language Models

Anonymous Author(s)

In Supplementary Materials, we provide additional experimental results and implementation details for further comprehension of our proposed method.

## 1 METHODS

In this section, we give a detailed derivation for the selection of  $\lambda$  in Equation (4) of the main text. We introduce a regularization term,  $\lambda\|\mathbf{m}_q - \mathbf{S}_d\mathbf{w}\|_2^2$ , to constrain the reconstruction error. However, note that, if  $\lambda$  is too large, the optimal solution would ignore the sparse optimization of weight  $\mathbf{w}$ . Conversely, if we choose a  $\lambda$  that is too small, the optimization process would not sufficiently consider the reconstruction error penalty. Following [9], we utilize the binary penalty search (BPS) algorithm to address this issue. First, we rewrite Equation (4) as a penalty problem of  $\lambda$ :

$$\Gamma(\lambda) : \min_{\mathbf{w}} \|\mathbf{w}\|_1 + \lambda\|\mathbf{m}_q - \mathbf{S}_d\mathbf{w}\|_2^2.$$

We establish the upper and lower bonds of  $\lambda$ , i.e.,  $\lambda_r > \lambda_l \geq 0$ . By solving  $\Gamma(\lambda_r)$ , we obtain a solution  $\mathbf{w}_r$  that satisfies the reconstruction constraint  $\|\mathbf{m}_q - \mathbf{S}_d\mathbf{w}\|_2^2 \leq \sigma$ , while solving  $\Gamma(\lambda_l)$  yields a solution  $\mathbf{w}_l$  that exceeds the error constraint. Our objective is to find a  $\lambda$  in  $(\lambda_l, \lambda_r)$  with which solving  $\Gamma(\lambda)$  yields a solution with sparser weights than that of  $\Gamma(\lambda_r)$  while still adhering to the reconstruction constraint.

To achieve this, we employ a binary search for the optimal  $\lambda$ . At the start of each iteration, we set  $\lambda = (\lambda_l + \lambda_r)/2$  and assess the solution of  $\Gamma(\lambda)$ . If  $\|\mathbf{m}_q - \mathbf{S}_d\mathbf{w}\|_2^2 > \delta$ , we update the lower bound  $\lambda_l$  to  $\lambda$ ; otherwise, we decrease the upper bound  $\lambda_r$ . The interval range is halved after each iteration, progressively narrowing down to a sufficiently small search range smaller than  $\epsilon$ . The most appropriate  $\lambda$  is then determined as  $\lambda_r$ . The details of the BPS algorithm are outlined below.

---

### Algorithm 1 Binary Penalty Search

---

**Require:**  $\mathbf{m}_q, \mathbf{S}_d, \delta$ , stop threshold  $\epsilon$ .

**Ensure:** optimal solution  $\mathbf{w}_\star$

Initialize  $\lambda_l = 0, \lambda_r = \lambda_{\max}$ .

**repeat**

$\lambda = (\lambda_l + \lambda_r)/2$ ;

    Solve Problem (4) by ADM to obtain  $\mathbf{w}_\star$ ;

**if**  $\|\mathbf{m}_q - \mathbf{S}_d\mathbf{w}_\star\|_2^2 \leq \delta$  **then**

$\lambda_r = \lambda$ ;

**else**

$\lambda_l = \lambda$ ;

**end if**

**until**  $\lambda_r - \lambda_l \leq \epsilon$

---

## 2 MORE IMPLEMENTATION DETAILS

### 2.1 Dataset Details

We adopt the few-shot evaluation protocol to assess our method on 11 widely-used image classification datasets, spanning the breadth of generic object classification (ImageNet [14], Caltech101 [5]), fine-grained object classification (OxfordPets [12], StanfordCars [8], Flowers102 [11], Food-101 [1], FGVCircraft [10]), texture classification (DTD [3]), remote sensing recognition (EuroSAT [7]), scene recognition (SUN397 [18]), and action recognition (UCF101 [15]). We evaluate the domain generalization performance of ImageNet [4], ImageNet-V2 [14] and ImageNet-Sketch [17]. The details of each dataset are shown in Table 1, including the number of classes, the sizes of training and testing sets, and the original tasks.

## 3 MORE EXPERIMENTAL RESULTS

### 3.1 Few-Shot Recognition Accuracy

In Section 4.2, we provide line charts to exhibit the performance of our proposed TaCo and other baseline methods, including zero-shot CLIP and [13] and CALIP [6], along with other state-of-the-art training-free methods, encompassing APE [21], Tip-X [16] and Tip-Adapter [20]. Here we provide detailed per-dataset results on all 11 recognition datasets in Table 2. We include results from those existing works for easier comparison and bold the best result for each shot and each dataset in the table. All the few-shot recognition results are based on the ResNet-50 backbone. According to the table, our proposed method demonstrates strong consistency across all types of recognition tasks and remarkably outperforms APE on Average by +1.72% across all few-shot settings.

Meanwhile, to test the additional performance improvement of TaCo when incorporated with other training-methods, we present the per-dataset accuracy result when combined with PLOT [2] and [19], respectively. As shown in Table 3, we compare the incorporated methods with PLOT [2], Tip-Adapter-F [20] and APE-T [21]. It can be observed that with the aid of TaCo, both prompt-based and adapter-based method surpasses baseline methods and on action recognition task (UCF101), our method remarkably surpasses APE-T by 4.8% with PLOT on the 8-shot setting. All the experiment results manifest the consistency and portability of our method.

## REFERENCES

- [1] Lukas Bossard, Matthieu Guillaumin, and Luc Van Gool. 2014. Food-101-mining discriminative components with random forests. In *European Conference on Computer Vision*. 446–461.
- [2] Guangyi Chen, Weiran Yao, Xiangchen Song, Xinyue Li, Yongming Rao, and Kun Zhang. 2023. PLOT: Prompt learning with optimal transport for vision-language models. In *International Conference on Learning Representations*.
- [3] Mircea Cimpoi, Subhansu Maji, Iasonas Kokkinos, Sammy Mohamed, and Andrea Vedaldi. 2014. Describing textures in the wild. In *Proceedings of the IEEE/CVF Conference on Computer Vision and Pattern Recognition*. 3606–3613.
- [4] Jia Deng, Wei Dong, Richard Socher, Li-Jia Li, Kai Li, and Li Fei-Fei. 2009. Imagenet: A large-scale hierarchical image database. In *Proceedings of the IEEE/CVF Conference on Computer Vision and Pattern Recognition*. 248–255.

Table 1: The detailed statistics of datasets used in experiments.

| Dataset              | Classes | Training size | Testing size | Task                              |
|----------------------|---------|---------------|--------------|-----------------------------------|
| Caltech101 [5]       | 100     | 4,128         | 2,465        | Object recognition                |
| DTD [3]              | 47      | 2,820         | 1,692        | Texture recognition               |
| EuroSAT [7]          | 10      | 13,500        | 8,100        | Satellite image recognition       |
| FGVCAircraft [10]    | 100     | 3,334         | 3,333        | Fine-grained aircraft recognition |
| Flowers102 [11]      | 102     | 4,093         | 2,463        | Fine-grained flowers recognition  |
| Food101 [1]          | 101     | 50,500        | 30,300       | Fine-grained food recognition     |
| ImageNet [14]        | 1,000   | 1.28M         | 50,000       | Object recognition                |
| OxfordPets [12]      | 37      | 2,944         | 3,669        | Fine-grained pets recognition     |
| StanfordCars [8]     | 196     | 6,509         | 8,041        | Fine-grained car recognition      |
| SUN397 [18]          | 397     | 15,880        | 19,850       | Scene recognition                 |
| UCF101 [15]          | 101     | 7,639         | 3,783        | Action recognition                |
| ImageNet-V2 [14]     | 1,000   | -             | 10,000       | Robustness of collocation         |
| ImageNet-Sketch [17] | 1,000   | -             | 50,889       | Robustness of sketch domain       |

Table 2: Training-free few-shot recognition accuracy on 11 datasets.

| Method         | Shots | Dataset     |             |             |             |             |             |             |             |             |             |             |             |
|----------------|-------|-------------|-------------|-------------|-------------|-------------|-------------|-------------|-------------|-------------|-------------|-------------|-------------|
|                |       | ImageNet    | Caltech     | Pets        | Car         | Flowers     | Food        | Aircraft    | DTD         | SUN397      | EuroSAT     | UCF101      | Average     |
| Zero-Shot CLIP | 0     | 60.3        | 84.5        | 85.5        | 54.3        | 65.5        | 77.3        | 17.0        | 41.2        | 58.6        | 41.8        | 61.4        | 58.8        |
| CALIP          | 0     | 60.6        | 87.7        | 86.2        | 56.4        | 66.5        | 77.4        | 17.8        | 42.4        | 58.6        | 38.9        | 61.7        | 59.4        |
| Tip-Adapter    | 1     | 60.7        | 87.2        | 86.0        | 57.4        | 73.1        | 77.4        | 18.8        | 46.2        | 61.3        | 54.4        | 62.7        | 62.3        |
|                | 2     | 60.9        | 88.3        | 87.0        | 58.5        | 79.1        | 77.5        | 21.2        | 49.6        | 62.7        | 61.5        | 64.7        | 64.6        |
|                | 4     | 61.0        | 89.2        | 86.5        | 61.5        | 83.8        | 77.5        | 22.1        | 53.9        | 64.2        | 65.5        | 66.2        | 66.5        |
|                | 8     | 61.5        | 89.6        | 86.9        | 63.1        | 87.9        | 77.7        | 25.5        | 58.3        | 65.6        | 67.9        | 68.4        | 68.4        |
|                | 16    | 62.0        | 90.2        | 88.5        | 66.7        | 89.8        | 77.9        | 29.9        | 60.6        | 66.8        | 70.6        | 70.7        | 70.3        |
| Tip-X          | 1     | 60.7        | 88.4        | 85.4        | 58.8        | 73.4        | 77.4        | 20.1        | 46.9        | 61.7        | 55.8        | 62.8        | 62.8        |
|                | 2     | 61.0        | 88.6        | 87.9        | 60.3        | 79.4        | 77.5        | 22.0        | 50.1        | 63.4        | 61.5        | 66.4        | 65.3        |
|                | 4     | 61.1        | 89.3        | 88.3        | 63.8        | 85.9        | 77.5        | 22.9        | 55.2        | 64.9        | 68.1        | 66.8        | 67.6        |
|                | 8     | 61.5        | 89.8        | <b>89.1</b> | 65.8        | 88.5        | 77.9        | 26.9        | 59.3        | 66.3        | 68.8        | 68.9        | 69.3        |
|                | 16    | 62.1        | 90.7        | 89.9        | 67.3        | 90.2        | 77.9        | 30.1        | 63.5        | 68.0        | 73.1        | 71.9        | 71.3        |
| APE            | 1     | 62.0        | 90.5        | 86.3        | 59.6        | 79.6        | 77.6        | 20.8        | 52.6        | 64.4        | 59.7        | 63.2        | 65.1        |
|                | 2     | 62.3        | 91.0        | 87.1        | 61.4        | 83.6        | 77.6        | 22.9        | 58.6        | 65.9        | 62.8        | 65.7        | 67.2        |
|                | 4     | 62.5        | 91.8        | 87.3        | 65.1        | 87.9        | 77.6        | 24.4        | 60.7        | 66.6        | 70.3        | 69.9        | 69.4        |
|                | 8     | 62.8        | 91.9        | 87.5        | 66.7        | 91.1        | 78.3        | 28.3        | 66.0        | 68.4        | 74.4        | 71.7        | 71.6        |
|                | 16    | 63.4        | 92.5        | 88.9        | 70.3        | 91.9        | 78.5        | 31.2        | 67.7        | 69.7        | 78.1        | 74.5        | 73.3        |
| TaCo (Ours)    | 1     | <b>62.5</b> | <b>91.3</b> | <b>87.1</b> | <b>61.0</b> | <b>81.0</b> | <b>78.6</b> | <b>23.2</b> | <b>53.6</b> | <b>65.3</b> | <b>61.3</b> | <b>65.3</b> | <b>66.4</b> |
|                | 2     | <b>63.0</b> | <b>92.4</b> | <b>88.0</b> | <b>63.6</b> | <b>84.9</b> | <b>79.0</b> | <b>25.3</b> | <b>60.4</b> | <b>68.0</b> | <b>64.8</b> | <b>69.0</b> | <b>68.9</b> |
|                | 4     | <b>63.6</b> | <b>93.2</b> | <b>88.4</b> | <b>66.3</b> | <b>89.4</b> | <b>79.0</b> | <b>28.7</b> | <b>62.6</b> | <b>68.7</b> | <b>72.2</b> | <b>71.6</b> | <b>71.2</b> |
|                | 8     | <b>64.2</b> | <b>93.8</b> | 89.0        | <b>69.7</b> | <b>92.5</b> | <b>79.4</b> | <b>32.4</b> | <b>66.9</b> | <b>69.9</b> | <b>77.1</b> | <b>76.8</b> | <b>73.8</b> |
|                | 16    | <b>65.2</b> | <b>94.0</b> | <b>90.7</b> | <b>73.2</b> | <b>94.1</b> | <b>80.6</b> | <b>35.6</b> | <b>70.0</b> | <b>71.9</b> | <b>81.9</b> | <b>78.0</b> | <b>75.9</b> |

Table 3: Training-based few-shot recognition accuracy on 11 datasets.

| Method         | Shots | Dataset     |             |             |             |             |             |             |             |             |             |             |         |
|----------------|-------|-------------|-------------|-------------|-------------|-------------|-------------|-------------|-------------|-------------|-------------|-------------|---------|
|                |       | ImageNet    | Caltech     | Pets        | Car         | Flowers     | Food        | Aircraft    | DTD         | SUN397      | EuroSAT     | UCF101      | Average |
| Zero-Shot CLIP | 0     | 60.3        | 84.5        | 85.5        | 54.3        | 65.5        | 77.3        | 17.0        | 41.2        | 58.6        | 41.8        | 61.4        | 58.8    |
| PLOT           | 1     | 59.5        | 89.7        | 87.5        | 56.6        | 71.7        | 77.7        | 17.9        | 46.6        | 62.6        | 54.1        | 64.5        | 62.6    |
|                | 2     | 60.6        | 90.8        | 86.6        | 57.5        | 81.2        | 77.7        | 18.9        | 51.2        | 61.7        | 64.2        | 66.8        | 65.2    |
|                | 4     | 61.5        | 90.8        | 88.6        | 63.4        | 87.8        | 77.2        | 22.4        | 56.0        | 65.1        | 72.4        | 69.6        | 68.6    |
|                | 8     | 61.9        | 91.5        | 87.4        | 67.0        | 92.4        | 75.3        | 26.5        | 61.7        | 67.7        | 78.2        | 74.7        | 71.3    |
|                | 16    | 63.0        | 92.2        | 87.2        | 72.8        | 94.8        | 77.1        | 31.5        | 65.6        | 70.0        | 82.2        | 77.3        | 74.0    |
| Tip-Adapter-F  | 1     | 61.3        | 89.4        | 86.9        | 58.5        | 80.1        | 77.6        | 20.8        | 50.3        | 62.5        | 59.2        | 64.9        | 64.7    |
|                | 2     | 61.7        | 89.8        | 87.1        | 62.1        | 82.5        | 77.8        | 23.5        | 54.0        | 63.6        | 65.8        | 66.2        | 66.7    |
|                | 4     | 62.5        | 90.6        | 87.7        | 64.8        | 89.0        | 78.3        | 26.0        | 57.8        | 66.1        | 73.9        | 70.9        | 69.8    |
|                | 8     | 64.0        | 91.5        | 88.1        | 69.5        | 91.9        | 78.7        | 30.2        | 62.7        | 68.8        | 77.8        | 74.5        | 72.5    |
|                | 16    | 65.5        | 92.9        | 89.7        | 75.5        | 95.0        | 79.5        | 35.5        | 67.3        | 71.3        | 83.8        | 78.0        | 75.8    |
| APE-T          | 1     | 62.5        | 90.5        | 87.1        | 60.8        | 83.3        | 77.6        | 24.6        | 54.6        | 66.0        | 65.9        | 66.5        | 67.2    |
|                | 2     | 63.3        | 90.8        | 87.3        | 63.9        | 87.9        | 78.1        | 25.5        | 58.8        | 67.3        | 71.7        | 69.2        | 69.4    |
|                | 4     | 63.7        | 91.7        | 88.5        | 68.4        | 92.1        | 78.6        | 29.1        | 65.4        | 69.0        | 74.8        | 73.4        | 72.2    |
|                | 8     | 64.8        | 93.0        | 88.8        | 71.4        | 94.7        | 78.9        | 33.3        | 67.0        | 71.1        | 80.8        | 75.4        | 74.5    |
|                | 16    | 66.1        | 93.2        | 90.2        | 76.5        | 96.2        | 79.5        | 39.5        | 69.6        | 72.7        | 86.8        | 79.7        | 77.3    |
| TaskRes+TaCo   | 1     | <b>63.3</b> | <b>91.5</b> | 87.5        | 61.8        | 84.1        | <b>78.3</b> | 26.1        | 55.0        | 66.5        | 66.2        | 67.8        | 68.0    |
|                | 2     | <b>64.0</b> | 92.0        | 87.9        | 64.9        | 88.8        | <b>79.1</b> | 27.3        | 58.8        | 68.0        | 72.9        | 71.6        | 70.5    |
|                | 4     | <b>64.9</b> | 92.8        | 89.6        | 70.1        | 94.1        | <b>79.3</b> | 31.2        | 66.3        | <b>70.5</b> | 76.8        | 75.9        | 73.8    |
|                | 8     | 65.9        | <b>94.5</b> | 89.9        | 72.9        | <b>95.7</b> | <b>80.3</b> | 34.6        | 67.8        | <b>71.7</b> | 81.0        | 78.6        | 75.7    |
|                | 16    | <b>67.3</b> | <b>95.0</b> | 91.6        | 78.6        | 97.2        | <b>82.2</b> | 40.6        | 71.3        | 73.1        | 87.9        | 81.3        | 78.7    |
| PLOT+TaCo      | 1     | 63.2        | 91.3        | <b>87.9</b> | <b>63.1</b> | <b>84.8</b> | 78.1        | <b>26.3</b> | <b>57.5</b> | <b>66.8</b> | <b>68.1</b> | <b>68.8</b> | 68.7    |
|                | 2     | 64.0        | <b>92.4</b> | <b>88.1</b> | <b>65.6</b> | <b>89.1</b> | 78.7        | <b>28.3</b> | <b>62.4</b> | <b>68.1</b> | <b>74.9</b> | <b>71.8</b> | 71.2    |
|                | 4     | 64.8        | <b>92.8</b> | <b>90.1</b> | <b>70.7</b> | <b>94.9</b> | 78.8        | <b>31.4</b> | <b>67.3</b> | 70.0        | <b>77.8</b> | <b>77.4</b> | 74.2    |
|                | 8     | <b>66.1</b> | 93.6        | <b>91.5</b> | <b>74.6</b> | 95.3        | 79.6        | <b>35.1</b> | <b>69.6</b> | 71.6        | <b>81.2</b> | <b>81.2</b> | 76.3    |
|                | 16    | 67.1        | 94.2        | <b>92.3</b> | <b>79.0</b> | <b>97.6</b> | 81.3        | <b>40.9</b> | <b>72.4</b> | <b>73.3</b> | <b>88.8</b> | <b>83.6</b> | 79.1    |

- [5] Li Fei-Fei, Rob Fergus, and Pietro Perona. 2004. Learning generative visual models from few training examples: An incremental bayesian approach tested on 101 object categories. In *Proceedings of the IEEE/CVF Conference on Computer Vision and Pattern Recognition Workshops*. 178–178.
- [6] Ziyu Guo, Renrui Zhang, Longtian Qiu, Xianzheng Ma, Xupeng Miao, Xuming He, and Bin Cui. 2023. Calip: Zero-shot enhancement of clip with parameter-free attention. In *Proceedings of the AAAI Conference on Artificial Intelligence*, Vol. 37. 746–754.
- [7] Patrick Helber, Benjamin Bischke, Andreas Dengel, and Damian Borth. 2019. Eurosat: A novel dataset and deep learning benchmark for land use and land cover classification. *IEEE Journal of Selected Topics in Applied Earth Observations and Remote Sensing* 12, 7 (2019), 2217–2226.
- [8] Jonathan Krause, Michael Stark, Jia Deng, and Li Fei-Fei. 2013. 3D object representations for fine-grained categorization. In *Proceedings of the IEEE/CVF International Conference on Computer Vision Workshops*. 554–561.
- [9] Zihan Liao, Fan Liu, Ang Li, and Christos Masouros. 2023. Faster-Than-Nyquist Symbol-Level Precoding for Wideband Integrated Sensing and Communications. *arXiv preprint arXiv:2306.14509* (2023).
- [10] Subhransu Maji, Esa Rahtu, Juho Kannala, Matthew Blaschko, and Andrea Vedaldi. 2013. Fine-grained visual classification of aircraft. *arXiv preprint arXiv:1306.5151* (2013).
- [11] Maria-Elena Nilsback and Andrew Zisserman. 2008. Automated flower classification over a large number of classes. In *Indian Conference on Computer Vision, Graphics and Image Processing*.
- [12] Omkar M Parkhi, Andrea Vedaldi, Andrew Zisserman, and CV Jawahar. 2012. Cats and dogs. In *Proceedings of the IEEE/CVF Conference on Computer Vision and Pattern Recognition*. 3498–3505.
- [13] Alec Radford, Jong Wook Kim, Chris Hallacy, Aditya Ramesh, Gabriel Goh, Sandhini Agarwal, Girish Sastry, Amanda Askell, Pamela Mishkin, Jack Clark, et al. 2021. Learning transferable visual models from natural language supervision. In *International Conference on Machine Learning*.
- [14] Benjamin Recht, Rebecca Roelofs, Ludwig Schmidt, and Vaishaal Shankar. 2019. Do imagenet classifiers generalize to imagenet?. In *International Conference on Machine Learning*.
- [15] Khurram Soomro, Amir Roshan Zamir, and Mubarak Shah. 2012. UCF101: A dataset of 101 human actions classes from videos in the wild. *arXiv preprint arXiv:1212.0402* (2012).
- [16] Vishaal Udandarao, Ankush Gupta, and Samuel Albanie. 2023. Sus-x: Training-free name-only transfer of vision-language models. In *Proceedings of the IEEE/CVF International Conference on Computer Vision*. 2725–2736.
- [17] Haoan Wang, Songwei Ge, Zachary Lipton, and Eric P Xing. 2019. Learning robust global representations by penalizing local predictive power. In *Advances in Neural Information Processing Systems*, Vol. 32.
- [18] Jianxiang Xiao, James Hays, Krista A Ehinger, Aude Oliva, and Antonio Torralba. 2010. Sun database: Large-scale scene recognition from abbey to zoo. In *Proceedings of the IEEE/CVF Conference on Computer Vision and Pattern Recognition*. 3485–3492.
- [19] Tao Yu, Zhihe Lu, Xin Jin, Zhibo Chen, and Xinchao Wang. 2023. Task residual for tuning vision-language models. In *Proceedings of the IEEE/CVF Conference on Computer Vision and Pattern Recognition*. 10899–10909.
- [20] Renrui Zhang, Wei Zhang, Rongyao Fang, Peng Gao, Kunchang Li, Jifeng Dai, Yu Qiao, and Hongsheng Li. 2022. Tip-adapter: Training-free adaption of clip for

[21] Xiangyang Zhu, Renrui Zhang, Bowei He, Aojun Zhou, Dong Wang, Bin Zhao, and Peng Gao. 2023. Not all features matter: Enhancing few-shot clip with

adaptive prior refinement. *arXiv preprint arXiv:2304.01195* (2023).

349  
350  
351  
352  
353  
354  
355  
356  
357  
358  
359  
360  
361  
362  
363  
364  
365  
366  
367  
368  
369  
370  
371  
372  
373  
374  
375  
376  
377  
378  
379  
380  
381  
382  
383  
384  
385  
386  
387  
388  
389  
390  
391  
392  
393  
394  
395  
396  
397  
398  
399  
400  
401  
402  
403  
404  
405  
406

407  
408  
409  
410  
411  
412  
413  
414  
415  
416  
417  
418  
419  
420  
421  
422  
423  
424  
425  
426  
427  
428  
429  
430  
431  
432  
433  
434  
435  
436  
437  
438  
439  
440  
441  
442  
443  
444  
445  
446  
447  
448  
449  
450  
451  
452  
453  
454  
455  
456  
457  
458  
459  
460  
461  
462  
463  
464
